# Supplementary material for: Fecal microbiota transplant rescues mice from human pathogen mediated sepsis by restoring systemic immunity
Source: PubMed Central journal article supplement (PMC7214422; doi:10.1038/s41467-020-15545-w), 2020-05-11
Supplement: 41467_2020_15545_MOESM7_ESM.pdf [file 41467_2020_15545_MOESM7_ESM.pdf]

## Reporting Summary

Nature Research wishes to improve the reproducibility of the work that we publish. This form provides structure for consistency and transparency in reporting. For further information on Nature Research policies, see [Authors & Referees](#) and the [Editorial Policy Checklist](#).

### Statistical parameters

When statistical analyses are reported, confirm that the following items are present in the relevant location (e.g. figure legend, table legend, main text, or Methods section).

n/a Confirmed

- The exact sample size ( $n$ ) for each experimental group/condition, given as a discrete number and unit of measurement
- An indication of whether measurements were taken from distinct samples or whether the same sample was measured repeatedly
- The statistical test(s) used AND whether they are one- or two-sided  
*Only common tests should be described solely by name; describe more complex techniques in the Methods section.*
- A description of all covariates tested
- A description of any assumptions or corrections, such as tests of normality and adjustment for multiple comparisons
- A full description of the statistics including central tendency (e.g. means) or other basic estimates (e.g. regression coefficient) AND variation (e.g. standard deviation) or associated estimates of uncertainty (e.g. confidence intervals)
- For null hypothesis testing, the test statistic (e.g.  $F$ ,  $t$ ,  $r$ ) with confidence intervals, effect sizes, degrees of freedom and  $P$  value noted  
*Give  $P$  values as exact values whenever suitable.*
- For Bayesian analysis, information on the choice of priors and Markov chain Monte Carlo settings
- For hierarchical and complex designs, identification of the appropriate level for tests and full reporting of outcomes
- Estimates of effect sizes (e.g. Cohen's  $d$ , Pearson's  $r$ ), indicating how they were calculated
- Clearly defined error bars  
*State explicitly what error bars represent (e.g. SD, SE, CI)*

*Our web collection on [statistics for biologists](#) may be useful.*

### Software and code

Policy information about [availability of computer code](#)

Data collection

For quantitative PCR, LightCycler® 480 Software was used.

Data analysis

Gene transcriptional analysis was performed in R, using the Bioconductor software package lumi, the Bioconductor limma package, and Gene Ontology (GO) enrichment analysis were done using Gorilla. 16S rRNA analysis was performed using the UPARSE pipeline, the "parallel\_assign\_taxonomy\_rdp.py" script of QIIME software, PyNast and FastTree, and the oligotyping pipeline. GraphPad Prism, Excel were used for all other analysis (see Methods for additional details).

For manuscripts utilizing custom algorithms or software that are central to the research but not yet described in published literature, software must be made available to editors/reviewers upon request. We strongly encourage code deposition in a community repository (e.g. GitHub). See the Nature Research [guidelines for submitting code & software](#) for further information.

## Data

Policy information about [availability of data](#)

All manuscripts must include a [data availability statement](#). This statement should provide the following information, where applicable:

- Accession codes, unique identifiers, or web links for publicly available datasets
- A list of figures that have associated raw data
- A description of any restrictions on data availability

The datasets generated during and/or analyzed during the current study are available in the Article, Supplementary Information files or available from the corresponding author on reasonable request. Microarray data was uploaded to the NCBI Gene Expression Omnibus database, GEO accession number: GSE71530 [<https://www.ncbi.nlm.nih.gov/geo/query/acc.cgi?acc=GSE71530>]. Genome sequences of the ICU1-2 pathogen community members were uploaded to NCBI in BioProject PRJNA307050 [<https://www.ncbi.nlm.nih.gov/bioproject/?term=PRJNA307050>].

## Field-specific reporting

Please select the best fit for your research. If you are not sure, read the appropriate sections before making your selection.

Life sciences       Behavioural & social sciences       Ecological, evolutionary & environmental sciences

For a reference copy of the document with all sections, see [nature.com/authors/policies/ReportingSummary-flat.pdf](https://www.nature.com/authors/policies/ReportingSummary-flat.pdf)

## Life sciences study design

All studies must disclose on these points even when the disclosure is negative.

|                 |                                                                                                                                                                                                                                                                                                                                                                                                                                                                                                                                                 |
|-----------------|-------------------------------------------------------------------------------------------------------------------------------------------------------------------------------------------------------------------------------------------------------------------------------------------------------------------------------------------------------------------------------------------------------------------------------------------------------------------------------------------------------------------------------------------------|
| Sample size     | The majority of experiments were repeated at least three times to obtain data for indicated statistical analyses. Mice were allocated to experimental groups on the basis of their genotype and randomized within the given age-matched group. Given that our mice were inbred and matched for age, we always assumed similar variance between the different experimental groups. We did not perform an a priori sample size estimation but always used as many mice per group as possible in an attempt to minimize type I and type II errors. |
| Data exclusions | All experimental and control animals were littermates and none were excluded from the analysis at the time of harvest.                                                                                                                                                                                                                                                                                                                                                                                                                          |
| Replication     | The majority of experiments were repeated at least three times to ensure reproducibility. Statistical analyses were done to illustrate significance. All attempts to replicate experiments were successful.                                                                                                                                                                                                                                                                                                                                     |
| Randomization   | Mice were allocated to experimental groups on the basis of their genotype and randomized within the given age-matched group.                                                                                                                                                                                                                                                                                                                                                                                                                    |
| Blinding        | Investigators were not blinded during experiments and outcome assessment.                                                                                                                                                                                                                                                                                                                                                                                                                                                                       |

## Reporting for specific materials, systems and methods

### Materials & experimental systems

| n/a                                 | Involvement in the study                                        |
|-------------------------------------|-----------------------------------------------------------------|
| <input checked="" type="checkbox"/> | <input type="checkbox"/> Unique biological materials            |
| <input checked="" type="checkbox"/> | <input type="checkbox"/> Antibodies                             |
| <input type="checkbox"/>            | <input checked="" type="checkbox"/> Eukaryotic cell lines       |
| <input checked="" type="checkbox"/> | <input type="checkbox"/> Palaeontology                          |
| <input type="checkbox"/>            | <input checked="" type="checkbox"/> Animals and other organisms |
| <input checked="" type="checkbox"/> | <input type="checkbox"/> Human research participants            |

### Methods

| n/a                                 | Involvement in the study                        |
|-------------------------------------|-------------------------------------------------|
| <input checked="" type="checkbox"/> | <input type="checkbox"/> ChIP-seq               |
| <input checked="" type="checkbox"/> | <input type="checkbox"/> Flow cytometry         |
| <input checked="" type="checkbox"/> | <input type="checkbox"/> MRI-based neuroimaging |

## Eukaryotic cell lines

Policy information about [cell lines](#)

|                                                                      |                                                                                                            |
|----------------------------------------------------------------------|------------------------------------------------------------------------------------------------------------|
| Cell line source(s)                                                  | Mouse embryonic fibroblasts                                                                                |
| Authentication                                                       | Self generated - no separated authentication was performed.                                                |
| Mycoplasma contamination                                             | All cell lines tested negative for mycoplasma (tested using HEK-Blue™ TLR2 cells from Invivogen).          |
| Commonly misidentified lines<br>(See <a href="#">ICLAC</a> register) | <i>Name any commonly misidentified cell lines used in the study and provide a rationale for their use.</i> |

## Animals and other organisms

Policy information about [studies involving animals](#); [ARRIVE guidelines](#) recommended for reporting animal research

|                         |                                                                                                                                                                                                                                                                                                                                                                                                                                                                                                                                                                                                                             |
|-------------------------|-----------------------------------------------------------------------------------------------------------------------------------------------------------------------------------------------------------------------------------------------------------------------------------------------------------------------------------------------------------------------------------------------------------------------------------------------------------------------------------------------------------------------------------------------------------------------------------------------------------------------------|
| Laboratory animals      | Seven to nine-week old male C57BL/6 mice weighing 18-22 g were used for experiments. WT C57BL/6 were purchased from Charles River Laboratories. IRF3 <sup>-/-</sup> mice on a C57BL/6 background were kindly provided by Dr. Tatyana V. Golovkina (University of Chicago) and mice used in comparative studies were the progeny of IRF3 <sup>+/-</sup> mice resulting in IRF3 <sup>+/+</sup> and IRF3 <sup>-/-</sup> littermates. IRF3 <sup>+/+</sup> and IRF3 <sup>-/-</sup> littermates were cohoused until the day of the experiment to prevent microbiome related differences between genotypes from affecting results. |
| Wild animals            | This study did not involve any wild animals.                                                                                                                                                                                                                                                                                                                                                                                                                                                                                                                                                                                |
| Field-collected samples | This study did not involve any field-collected samples.                                                                                                                                                                                                                                                                                                                                                                                                                                                                                                                                                                     |
